# Supplementary material for: Is diversity harmful?—Mixed-brand cardiac implantable electronic devices undergoing magnetic resonance imaging
Source: Springer Nature journal article supplement (doi:10.1007/s00508-021-01924-w), 2021-08-17
Supplement: MOESM1 [file 19578160]

**Supplemental Figure 1.** MRI-Examinations stratified by years, “MRI-conditional”, “mixed-brands” and “MRIs with unknown CIEDs” groups.

| <b>Year</b>  | <b>MRIs with MR-conditional CIEDs</b> | <b>MRIs with mixed-brands CIEDs</b> | <b>MRIs with unknown CIEDs</b> | <b>total</b> |
|--------------|---------------------------------------|-------------------------------------|--------------------------------|--------------|
| 2013         | 10                                    | 5                                   | 0                              | 15           |
| 2014         | 7                                     | 4                                   | 1                              | 12           |
| 2015         | 8                                     | 6                                   | 0                              | 14           |
| 2016         | 25                                    | 9                                   | 2                              | 36           |
| 2017         | 26                                    | 14                                  | 9                              | 49           |
| 2018         | 39                                    | 7                                   | 19                             | 64           |
| 2019*        | 18                                    | 8                                   | 6                              | 32           |
| 2020*        | 2                                     | 1                                   | 2                              | 5            |
| <b>total</b> | 131                                   | 54                                  | 42                             | 227          |

CIED: cardiac implantable electronic device, MRI: magnetic resonance imaging

\*The years 2019 and 2020 were not fully examined by our study

**Supplemental Table1.** Baseline characteristics of excluded patients.

| <i>Parameter</i>                                | <i>Excluded patients</i> |
|-------------------------------------------------|--------------------------|
| <b>Demographics</b>                             |                          |
| <i>Number of patients</i>                       | 31                       |
| <i>Number of MRI procedures</i>                 | 39                       |
| <i>Age</i>                                      | 71 (63-80)               |
| <i>Female gender</i>                            | 25.8%                    |
| <i>Height (cm)<sup>†</sup></i>                  | 169±14                   |
| <i>Weight (kg)<sup>†</sup></i>                  | 83 (81-98)               |
| <b>CIED details</b>                             |                          |
| <i>CIED type<sup>†</sup></i>                    |                          |
| <i>Pacemaker</i>                                | 67.7%                    |
| <i>ICD</i>                                      | 12.9%                    |
| <i>Unknown</i>                                  | 19.4%                    |
| <b>Indication<sup>†</sup></b>                   |                          |
| <i>Atrioventricular block</i>                   | 16.7%                    |
| <i>Brady tachy syndrome</i>                     | 16.7%                    |
| <i>Sick sinus syndrome</i>                      | 0.0%                     |
| <i>Other block</i>                              | 0.0%                     |
| <i>Heart failure</i>                            | 33.3%                    |
| <i>Secondary prophylaxis</i>                    | 16.7%                    |
| <i>Other Indications</i>                        | 16.7%                    |
| <b>Generator brand<sup>†</sup></b>              |                          |
| <i>Biotronik</i>                                | 31.6%                    |
| <i>Boston Scientific</i>                        | 5.3%                     |
| <i>Medtronic</i>                                | 42.1%                    |
| <i>Sorin/LivaNova</i>                           | 0.0%                     |
| <i>St. Jude Medical/Abbott</i>                  | 21.1%                    |
| <i>Months since prior box change before MRI</i> | 19.9 (9.8-43.7)          |
| <i>Prior box change &lt; 1.5 months</i>         | 0.0%                     |
| <b>MRI details</b>                              |                          |
| <i>Location of MRI examination<sup>†</sup></i>  |                          |
| <i>Head or extremities</i>                      | 48.7%                    |
| <i>Extrathoracic torso</i>                      | 46.2%                    |
| <i>Thorax</i>                                   | 5.1%                     |
| <i>Pacing mode during MRI<sup>†</sup></i>       |                          |
| <i>OOO</i>                                      | 4.5%                     |
| <i>AOO/VOO</i>                                  | 18.2%                    |
| <i>DOO</i>                                      | 77.3%                    |
| <i>Estimated ERI before MRI (years)</i>         | 8.1 (5.8-11.0)           |

CIED: cardiac implantable electronic device, ICD: implantable cardioverter/defibrillator, MRI: magnetic resonance imaging, ERI: elective replacement indicator.

\* p<0.05; † data not complete in all patients.

**Supplemental Table 2.** CIED details of all included patients, mixed-brand and MRI-conditional groups - divided into pacemakers and ICDs.

| <i>Parameter</i>                          | <i>All included patients</i> | <i>mixed-brand group</i> | <i>MRI-conditional group</i> | <i>P value</i> |
|-------------------------------------------|------------------------------|--------------------------|------------------------------|----------------|
| <b>CIED details</b>                       |                              |                          |                              |                |
| <i>CIED type<sup>†</sup></i>              |                              |                          |                              | 0.338          |
| <i>Pacemaker</i>                          | 92.1%                        | 97.4%                    | 89.9%                        |                |
| <i>Transvenous ICD</i>                    | 6.3%                         | 2.6%                     | 7.9%                         |                |
| <i>Subcutaneous ICD</i>                   | 1.6%                         | 0%                       | 2.2%                         |                |
| <b>Pacemaker details</b>                  |                              |                          |                              |                |
| <b><i>Generator brand<sup>†</sup></i></b> |                              |                          |                              | <0.001*        |
| <i>Biotronik</i>                          | 29.9%                        | 2.7%                     | 42.5%                        |                |
| <i>Boston Scientific</i>                  | 10.3%                        | 10.8%                    | 10.0%                        |                |
| <i>Medtronic</i>                          | 26.5%                        | 37.8%                    | 21.3%                        |                |
| <i>Sorin/LivaNova</i>                     | 18.8%                        | 43.2%                    | 7.5%                         |                |
| <i>St. Jude Medical/Abbott</i>            | 14.5%                        | 5.4%                     | 18.8%                        |                |
| <b><i>Lead brand<sup>†</sup></i></b>      |                              |                          |                              | 0.002*         |
| <i>Biotronik</i>                          | 54.7%                        | 81.1%                    | 42.5%                        |                |
| <i>Boston Scientific</i>                  | 7.6%                         | 2.7%                     | 10.0%                        |                |
| <i>Medtronic</i>                          | 18.8%                        | 13.5%                    | 21.3%                        |                |
| <i>Sorin/LivaNova</i>                     | 5.1%                         | 0.0%                     | 7.5%                         |                |
| <i>St. Jude Medical/Abbott</i>            | 13.7%                        | 2.7%                     | 18.8%                        |                |
| <b>ICD details</b>                        |                              |                          |                              |                |
| <b><i>Generator brand<sup>†</sup></i></b> |                              |                          |                              | 1.000          |
| <i>Biotronik</i>                          | 60.0%                        | 100.0%                   | 55.6%                        |                |
| <i>Boston Scientific</i>                  | 40.0%                        | 0.0%                     | 44.4%                        |                |
| <b><i>Lead brand<sup>†</sup></i></b>      |                              |                          |                              | 0.100          |
| <i>Biotronik</i>                          | 50.0%                        | 0.0%                     | 55.6%                        |                |
| <i>Boston Scientific</i>                  | 40.0%                        | 0.0%                     | 44.4%                        |                |
| <i>Medtronic</i>                          | 10.0%                        | 100.0%                   | 0.0%                         |                |

CIED: cardiac implantable electronic device. ICD: implantable cardioverter/defibrillator. MRI: magnetic resonance imaging.

\* p<0,05; † data not complete in all patients.

**Supplemental Table 3.** Changes in lead performance compared by groups at different follow-ups

| Lead Parameters                       | Total       |                    | All-included patients |                    | MRI-Conditional group |                    | Mixed-Brands group |                    | Excluded patients |                    |
|---------------------------------------|-------------|--------------------|-----------------------|--------------------|-----------------------|--------------------|--------------------|--------------------|-------------------|--------------------|
|                                       | mean change | standard deviation | mean change           | standard deviation | mean change           | standard deviation | mean change        | standard deviation | mean change       | standard deviation |
| <b>Difference Pre-MRI/Post-MRI</b>    |             |                    |                       |                    |                       |                    |                    |                    |                   |                    |
| RA threshold (V)                      | -0.0        | 0.2                | +0.0                  | 0.2                | -0.0                  | 0.2                | +0.1               | 0.2                | -0.2              | 0.2                |
| RA sensing (%)                        | +2.8%       | 23.5               | +2.6%                 | 24.9               | +2.1%                 | 21.8               | +4.9%              | 36.4               | +4.5%             | 6.1                |
| RA impedance ( $\Omega$ )             | -9.4        | 56.9               | -7.7                  | 52.0               | -6.6                  | 52.5               | -13.5              | 50.6               | -24.9             | 93.7               |
| RV threshold (V)                      | +0.0        | 0.2                | +0.0                  | 0.2                | +0.0                  | 0.3                | -0.0               | 0.1                | -0.0              | 0.1                |
| RV sensing (%)                        | +7.2%       | 28.6               | +7.2%                 | 28.5               | +7.2%                 | 22.6               | +7.2%              | 43.1               | +7.2%             | 30.4               |
| RV impedance ( $\Omega$ )             | +6.5        | 49.1               | +7.4                  | 51.4               | +2.5                  | 53.1               | +26.3              | 40.1               | -1.6              | 18.3               |
| <b>Difference Pre-MRI/1.Follow-up</b> |             |                    |                       |                    |                       |                    |                    |                    |                   |                    |
| RA threshold (V)                      | +0.0        | 0.2                | +0.0                  | 0.3                | +0.0                  | 0.2                | -0.0               | 0.4                | +0.0              | 0.1                |
| RA sensing (%)                        | +8.4%       | 60.9               | +9.2%                 | 65.5               | +13.8%                | 71.6               | -9.8%              | 20.9               | +3.3%             | 13.7               |
| RA impedance ( $\Omega$ )             | +4.0        | 77.2               | +3.4                  | 66.9               | +3.0                  | 68.6               | +5.4               | 61.4               | +7.6              | 130.9              |
| RV threshold (V)                      | +0.0        | 0.3                | +0.0                  | 0.3                | +0.0                  | 0.3                | +0.0               | 0.3                | -0.0              | 0.1                |
| RV sensing (%)                        | +7.0%       | 31.6               | +6.9%                 | 32.8               | +8.0%                 | 33.3               | +3.5%              | 31.7               | +7.8%             | 24.9               |
| RV impedance ( $\Omega$ )             | +4.2        | 70.0               | +3.8                  | 74.9               | -3.2                  | 72.5               | +28.2              | 80.2               | +6.9              | 29.4               |
| <b>Difference Pre-MRI/2.Follow-up</b> |             |                    |                       |                    |                       |                    |                    |                    |                   |                    |
| RA threshold (V)                      | +0.1        | 0.3                | +0.1                  | 0.3                | +0.1                  | 0.3                | +0.1               | 0.3                | +0.0              | 0.2                |
| RA sensing (%)                        | -3.5%       | 27.4               | -4.1%                 | 27.5               | -3.2%                 | 27.6               | -7.6%              | 28.2               | +3.8%             | 27.7               |
| RA impedance ( $\Omega$ )             | +0.4        | 64.9               | -0.5                  | 65.7               | +0.0                  | 62.7               | -2.1               | 77.8               | +13.8             | 57.4               |
| RV threshold (V)                      | +0.0        | 0.2                | +0.1                  | 0.3                | +0.0                  | 0.3                | +0.1               | 0.3                | +0.0              | 0.1                |
| RV sensing (%)                        | -2.0%       | 29.9               | -1.8%                 | 31.1               | -0.3%                 | 32.2               | -6.1%              | 28.5               | -3.8%             | 19.4               |
| RV impedance ( $\Omega$ )             | +2.8        | 78.0               | +3.2                  | 80.9               | -7.5                  | 77.2               | +32.9              | 85.9               | -0.3              | 54.2               |

CIED: cardiac implantable electronic device, MRI: magnetic resonance imaging, RA: right atrial, RV: right ventricular
